# Supplementary material for: Simulation-aided characterization of a versatile water-based condensation particle counter for atmospheric airborne research
Source: Copernicus journal article supplement (doi:10.5194/amt-14-7329-2021), 2021-11-23
Supplement: Supplementary file 1 [file amt-14-7329-2021-supplement.pdf]

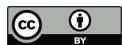

*Supplement of*

## **Simulation-aided characterization of a versatile water-based condensation particle counter for atmospheric airborne research**

**Fan Mei et al.**

*Correspondence to:* Fan Mei (fan.mei@pnnl.gov)

The copyright of individual parts of the supplement might differ from the article licence.

# 1 Numerical simulation of three-stage water-based CPC operation

## 2 Assumption

- 3 1. Water vapor through a cylindrical growth tube is described by the energy equation of a  
4 Newtonian fluid under steady laminar flow conditions.
- 5 2. The particle flow is assumed to be an incompressible Newtonian fluid with a fully developed  
6 parabolic flow profile:  $v_z(r) = v_0 \left(1 - \frac{r^2}{R^2}\right) = v_0(1 - x^2)$ , where  $v_0$ ,  $r$ , and  $R$  represent initial  
7 velocity (m/s), radial position (mm), and growth tube radius, respectively, and  $x$  is the  
8 dimensionless length.
- 9 3. Axial thermal diffusion and other second-order effects such as Stefan flow are ignored.

## 10 Simplified 1-D heat and mass transfer

11 The 1-D heat transfer: a partial differential equation of steady laminar flow:

$$12 \quad v_0 \left(1 - \frac{r^2}{R^2}\right) \frac{\partial T}{\partial z} = D_{th} \left[ \frac{1}{r} \frac{\partial}{\partial r} \left( r \frac{\partial T}{\partial r} \right) + \frac{\partial^2 T}{\partial z^2} \right] \quad (1)$$

13  $D_{th}$  is the thermal diffusivity of the air, 0.215 cm<sup>2</sup>/sec at STP. At the other operation condition in this  
14 study, we assume it is constant and the pressure effect is negligible.

15 The 1-D mass transfer: a partial differential equation for partial vapor pressure:

$$16 \quad v_0 \left(1 - \frac{r^2}{R^2}\right) \frac{\partial P_{va}}{\partial z} = D_{va} \left[ \frac{1}{r} \frac{\partial}{\partial r} \left( r \frac{\partial P_{va}}{\partial r} \right) + \frac{\partial^2 P_{va}}{\partial z^2} \right] \quad (2)$$

17  $D_{va}$  is the mass diffusivity of the water vapor, 0.251 cm<sup>2</sup>/sec at STP. At the other operation condition,  
18  $D_{va,P} = D_{va}/(P/1(atm)) * \left(\frac{T}{273}\right)^{1.94}$ .

19 The relative humidity or saturation ratio is defined as the ratio of the partial pressure of water vapor  
20 ( $P_{va}$ ) to the equilibrium saturated vapor pressure of water ( $P_{sat,T}$ ) at a given temperature:

$$21 \quad S = RH = \frac{P_{va}}{P_{sat,T}} \quad (3)$$

22 The saturated water vapor pressure can be calculated using Antoine equation (Bridgeman and Aldrich,  
23 1964):  $P_{sat,T} = 10^{(A-B/(T+C))}$

24  $A = 5.2039$ ,  $B = 1733.926$ ,  $C = -39.485$ , and  $T$  is the temperature in K, and  $P$  is the pressure in Pa.

25 Thus, the above equation can be converted to:

$$26 \quad v_0 \left(1 - \frac{r^2}{R^2}\right) \frac{\partial S}{\partial z} = D_{va} \left[ \frac{1}{r} \frac{\partial}{\partial r} \left( r \frac{\partial S}{\partial r} \right) + \frac{\partial^2 S}{\partial z^2} \right] \quad (4)$$

## 27 Simulation condition

- 28 1. The growth tube diameter is 6.3 mm ( $R=3.15$  mm);
- 29 2. The conditioner, initiator and moderator tubing lengths are 73 mm, 30 mm, and 73 mm;
- 30 3. Inlet conditions:  $T_0$ ,  $P_0$  is the partial water vapor pressure at  $T_0$ .
- 31 4. Wall conditions:  $T_{w1}$ ,  $T_{w2}$ , and  $T_{w3}$ , and corresponding  $P_{w1}$ ,  $P_{w2}$ , and  $P_{w3}$ .

32

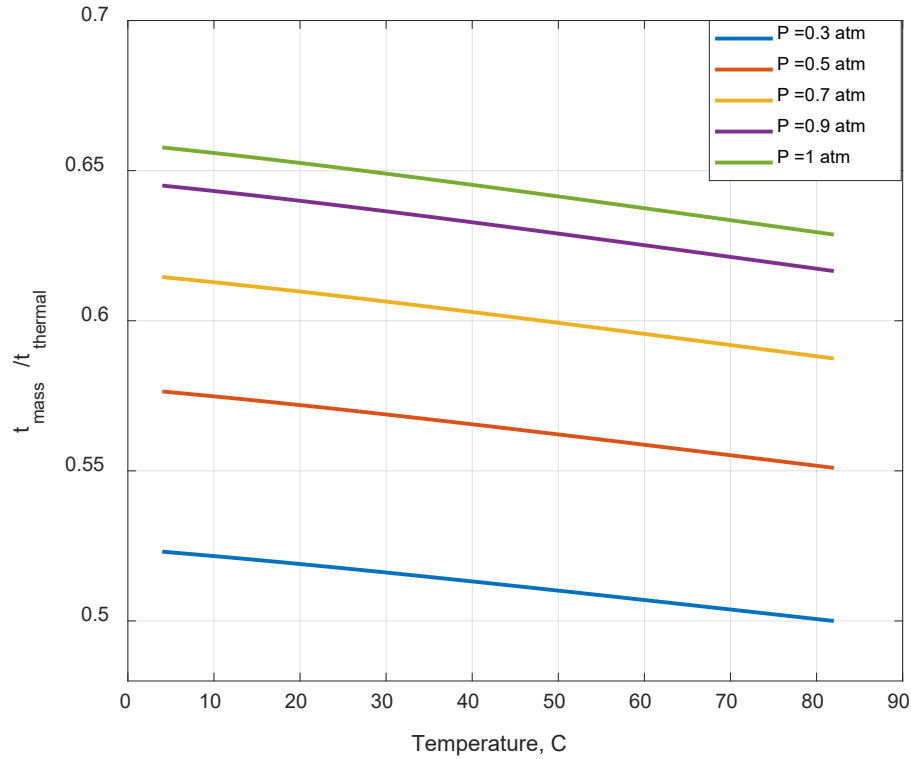

34

35 **Figure S1. Lewis number as a function of temperature under different operating pressure**

36 Although the configuration of CPC 3789 is different from the previous studies, two fundamental  
 37 characteristic times can describe how fast the thermal diffusion and the mass diffusion processes will  
 38 proceed.

$$39 \quad \tau_{thermal} = \frac{r^2}{D_{th}} = \frac{r^2}{k_a / \rho_a c_p} \quad (5)$$

$$40 \quad \tau_{mass} = \frac{r^2}{D_{va}} \quad (6)$$

41 The ratio of those two characteristic times can be designated as the ratio of the thermal diffusivity to  
 42 the molecular diffusivity of mass, which is also called the Lewis number.

$$43 \quad Le = \tau_{mass} / \tau_{thermal} = \frac{D_{th}}{D_{va}} = \frac{k_a}{D_{va} \times \rho_a \times c_p} \quad (7)$$

44 Where  $r$  is the radius of the growth tubing,  $D_{th}$  is the thermal diffusivity of the air and mainly a function  
 45 of temperature.  $D_{va}$  is the mass diffusivity of the water vapor, which depends on the pressure and  
 46 temperature, as detailed above. (Seinfeld and Pandis, 2016)

47 Based on the dimensionless analysis in Fig. S1, with the decrease of the operation pressure, the Lewis  
 48 number decreases, which means that the difference between the mass transfer rate and the thermal  
 49 transfer rate increased with the decrease of the operating pressure. Because the current numerical  
 50 model and theoretical analysis do not predict this observation, if we assume the water depletion and

51 condensational heat release are negligible, two factors most likely contribute to the counting efficiency  
52 decreases under the low-pressure condition: the significant loss inside the growth tube (wall effect or  
53 through the focusing nozzle) and the insufficient droplet growth inside the three-stage tube.

54

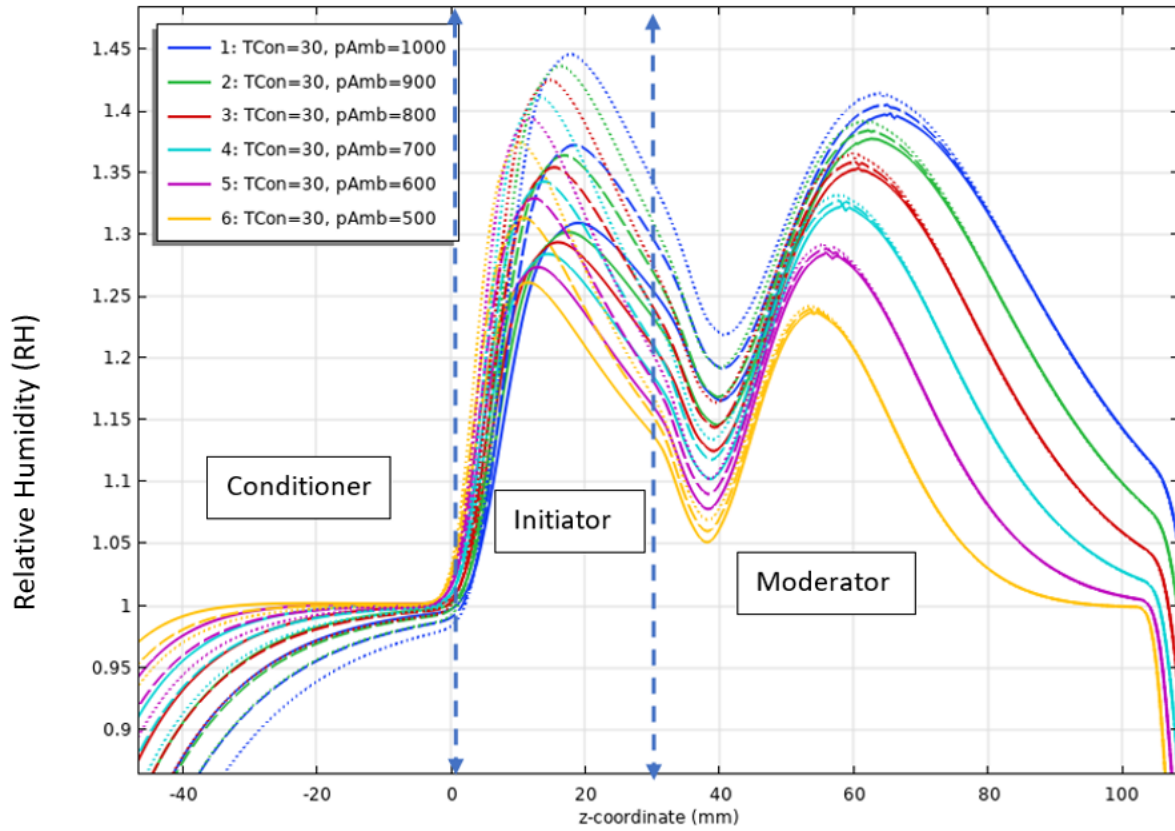

55

56 **Fig. S2. Saturation ratio calculated along the centerline under different ambient pressures for various conditioner**  
57 **temperatures. The solid lines are for  $T_{\text{cond}} = 30^{\circ}\text{C}$ . The dashed lines are for  $T_{\text{cond}} = 27^{\circ}\text{C}$ , and the dotted lines are for  $T_{\text{cond}} =$**   
58  **$24^{\circ}\text{C}$ . The colors indicate pressure in the hPa.**

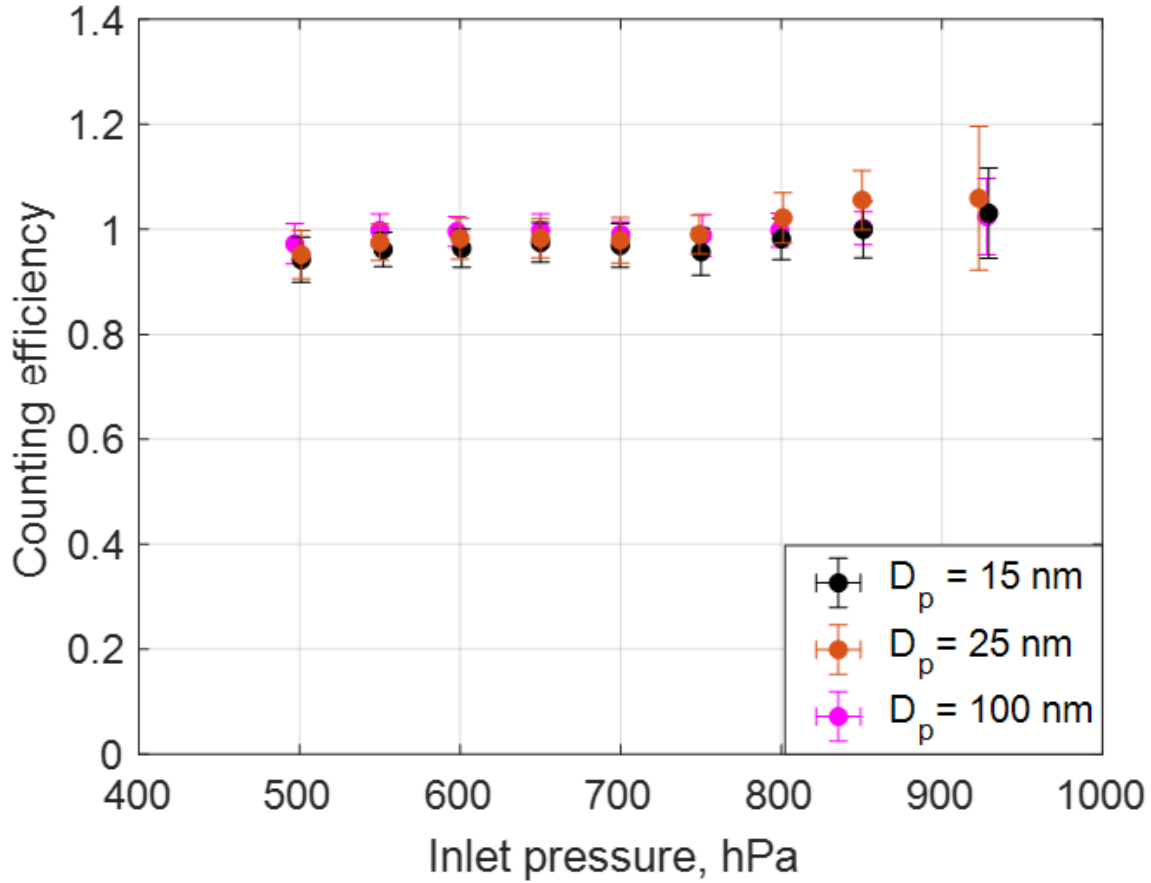

59

60 Fig. S3, CPC 3789 counting efficiency as a function of the inlet operation pressure at Tcond = 27 °C and Tini = 59 °C.

### 61 Simplified condensation effects on droplet size inside of the initiator

62 Lathem and Nenes (2011) examined the supersaturation profile generated in a continuous -flow  
 63 streamwise thermal-gradient growth tubing. Their work shows when water vapor depletion can have an  
 64 essential impact on supersaturation under certain conditions. The depletion effects on the  
 65 supersaturation (s) can be described by:

$$66 \quad s = s_0 - \frac{\pi R^2 R_g T^2}{\Delta H_v G Q P_s} \dot{C} \quad (8)$$

67 Where T is the temperature, Q is the aerosol flow rate, R is the radius of the growth tube, P<sub>s</sub> is the  
 68 saturation pressure of the water, and assuming G=dT/dz, and s<sub>0</sub> denotes the maximum supersaturation  
 69 ratio in the instrument for "zero" particle condition. R<sub>g</sub> is the specific gas constant for water vapor. ΔH<sub>v</sub>  
 70 is the enthalpy of evaporation of water, Ĉ describes the condensational loss (Seinfeld and Pandis, 2016).

71 The depletion effect leads to a lower supersaturation (s), hence a lower droplet size at the exit of the  
 72 growth tubing (Nenes and Seinfeld, 2003; Seinfeld and Pandis, 2016).

$$73 \quad D_p^2 = D_{p0}^2 - 2 \int \Gamma \frac{\pi R^2 R_g T^2}{\Delta H_v G Q P_s} \dot{C} dt \quad (9)$$

74 Where  $D_{p0}$  is the average droplet size at "zero" particle concentration for  $\dot{C} \rightarrow 0$ .

75  $\Gamma$  is a growth parameter that depends on the droplet size and the water vapor mass transfer coefficient  
76 (Seinfeld and Pandis, 2016).

$$77 \quad \Gamma = \frac{1}{\frac{\rho_w R T_\infty}{4P_{sat,T} D_{v\alpha,P'} M_w} + \frac{\Delta H_v \rho_w}{4k_a' T_\infty} \left( \frac{\Delta H_v M_w}{T_\infty R} - 1 \right)} \quad (10)$$

78 Where  $k_a'$  is a modified thermal conductivity described as equation (17.72) by Seinfeld and Pandis  
79 (2016).  $D_{v\alpha,P}'$  is a modified mass diffusivity described as equation (17.62) by Seinfeld and Pandis (2016).  
80 When calculated the above two modified conductivities, we assume the value of the thermal  
81 accommodation coefficient ( $\alpha_T$ ) was set equal to the mass accommodation coefficient ( $\alpha_c$ ) in this  
82 simplified analysis.

83 To further simplify the equation (8) and (9), more convenient forms can be derived if  $\dot{C}$  is explicitly  
84 written as a function of  $D_p$ ,  $N$ , and  $\Gamma$ . The average droplet size  $\overline{D_p} = (1/N) \sum_n N_i D_{pi}$ .

$$85 \quad \dot{C} = \frac{\pi R^* T \rho_w}{2M_w} \Gamma N \overline{D_p} s \quad (11)$$

86 If we write  $\Phi = \frac{\pi^2 R^2 R_g R^* T^3 \rho_w}{\Delta H_v G Q P_s M_w}$ , equation (8) can be simplified as

$$87 \quad \frac{s}{s_0} = \frac{1}{1 + \frac{\Phi}{2} \Gamma N \overline{D_p}} \quad (12)$$

88 Where  $R^*$ ,  $M_w$ ,  $\rho_w$  are the universal gas constant (8.314 J/mol/K), the molecular weight and density of  
89 liquid water.

90 The simplification of the droplet size depression equation results from equation (9) and (10)

$$91 \quad \frac{D_p}{D_{p0}} = \left( 1 + \Phi \Gamma N \overline{D_p} \right)^{-1/2} \quad (13)$$

92 The value of  $\alpha_c$  was varied from 1 for rapidly activating aerosol to 0.01 which for slowly activating  
93 aerosol. However, based on the estimation, this variation did not significantly affect the saturation and  
94 droplet size, as shown in Fig. S4. Additionally, reducing the conditioner temperature also has influenced  
95 (<20% with the 15% reduction of  $s$ ) the saturation profile. Previous studies showed that the droplet size  
96 exiting the moderator tube might have up to 90% particle loss if the droplet size is larger than 10  $\mu\text{m}$   
97 (Chen and Pui, 1995; Fletcher et al., 2009; Takegawa and Sakurai, 2011). Meanwhile, the signal-to-noise  
98 ratio is too high for small droplets. Thus, this simulation assumed the droplet size exiting the initiator is  
99 between 1 to 7  $\mu\text{m}$ .

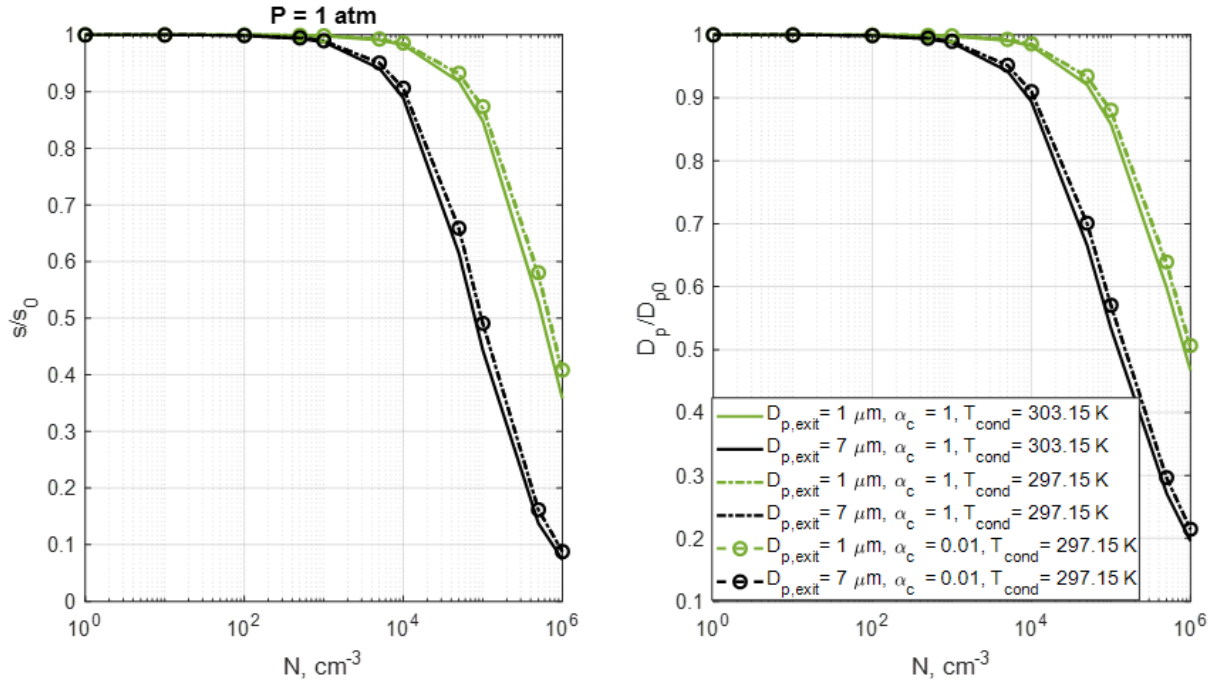

100

101 **Fig. S4. Predicted supersaturation depletion and droplet size depression ratio as a function of aerosol number concentration.**  
 102 **Results are shown for different mass accommodation coefficients and conditioner temperatures setting.**

103 The wCPC monitors the height of the pulses generated in the optical detector and reports a status  
 104 parameter to indicate the percentage of the sampled particles, which have an acceptably high pulse.  
 105 Although the exact droplet size detected by the detector is unknown, this pulse height parameter  
 106 indirectly shows insufficient particle growth in the detector chamber.

107 The saturation depletion and the droplet size depression are function of the aerosol number  
 108 concentration at the ambient condition (1 atm), as shown in Fig. S4. The 10% reduction of  $s$  and  $D_p$  is  
 109 predicted for  $N_{1\mu\text{m}} \sim 6 \times 10^4 \text{ (cm}^{-3}\text{)}$ , the mean droplet size at the initiator's exit is  $1 \mu\text{m}$  with the  
 110 conditioner temperature setting is  $30 \text{ }^\circ\text{C}$ . Under the same temperature setting, if the mean droplet size  
 111 at the exit of the initiator should be  $7 \mu\text{m}$  to make sure the detector counts the particles, the 10%  
 112 reduction of  $s$  and  $D_p$  happened when the  $N_{7\mu\text{m}} \sim 8.5 \times 10^3 \text{ (cm}^{-3}\text{)}$ . With the conditioner's temperature  
 113 decreased to  $24 \text{ }^\circ\text{C}$ , the threshold concentration ( $N_{1\mu\text{m}}$  and  $N_{7\mu\text{m}}$ ) for the 10% reduction of  $s$  and  $D_p$   
 114 increased about 15% ( $N_{1\mu\text{m}} \sim 7 \times 10^4 \text{ (cm}^{-3}\text{)}$  and  $N_{7\mu\text{m}} \sim 1 \times 10^4 \text{ (cm}^{-3}\text{)}$ ) from the concentration values  
 115 under the  $30 \text{ }^\circ\text{C}$  conditioner temperature. Thus, the droplet size at the initiator's exit determines the  
 116 aerosol number concentration limits due to the saturation depletion and the droplet size depression.

117 The simulation results shown in Fig. S4 suggest that the droplet size at the initiator's exit should be  
 118 larger than  $3 \mu\text{m}$  under the low-pressure. We examined the effect of the operating pressure on the 10%  
 119 reduction threshold theoretically, as shown in Fig. S5. The theoretical analysis suggests that the 10%  
 120 reduction threshold ( $N_{3\mu\text{m}}$ ) is about  $1.94 \times 10^4 \text{ (cm}^{-3}\text{)}$  at 1 atm, when the conditioner temperature is  
 121  $24 \text{ }^\circ\text{C}$ . Based on the theoretical analysis, with the decrease of the operating pressure, the 10% reduction  
 122 threshold of  $N_{3\mu\text{m}}$  reduced about 5% of the aerosol concentration ( $1.85 \times 10^4 \text{ (cm}^{-3}\text{)}$  at 0.5 atm).

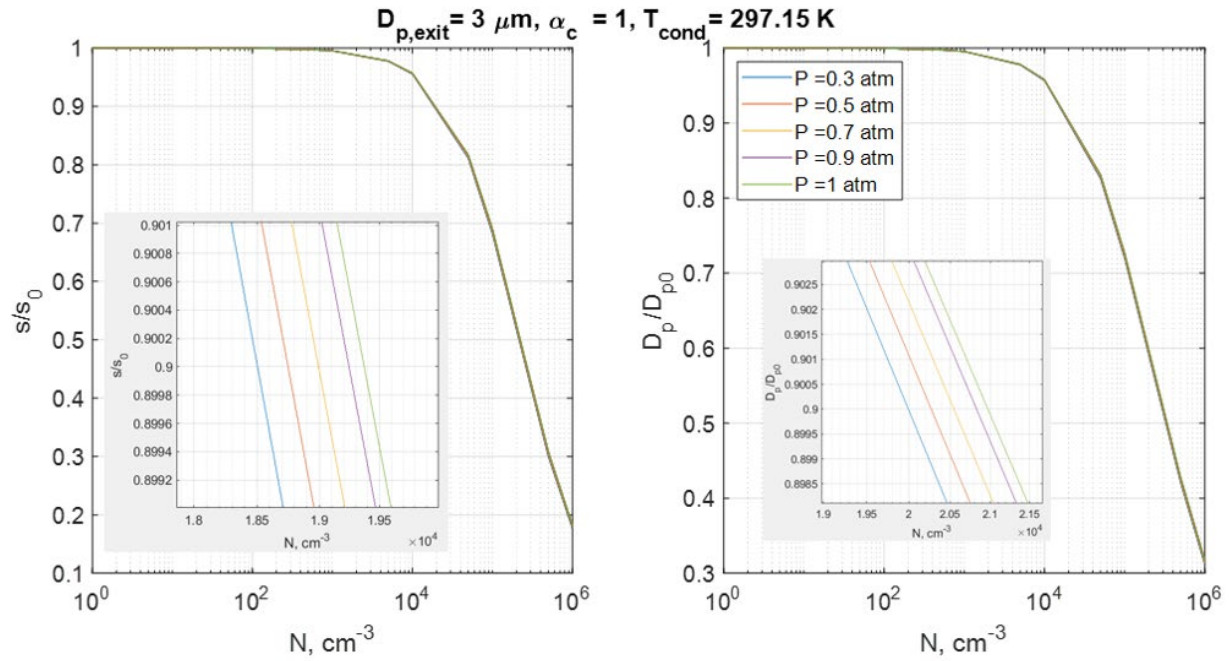

123

124 Fig. S5. Predicted supersaturation depletion and droplet size depression ratio as a function of aerosol number concentration.  
 125 Results are shown for a droplet size of  $3 \mu\text{m}$  exiting the initiator and the conditioner temperature at  $24 \text{ }^\circ\text{C}$ . The insets are  
 126 zoomed in plots for the narrowed  $S/S_0$  range.



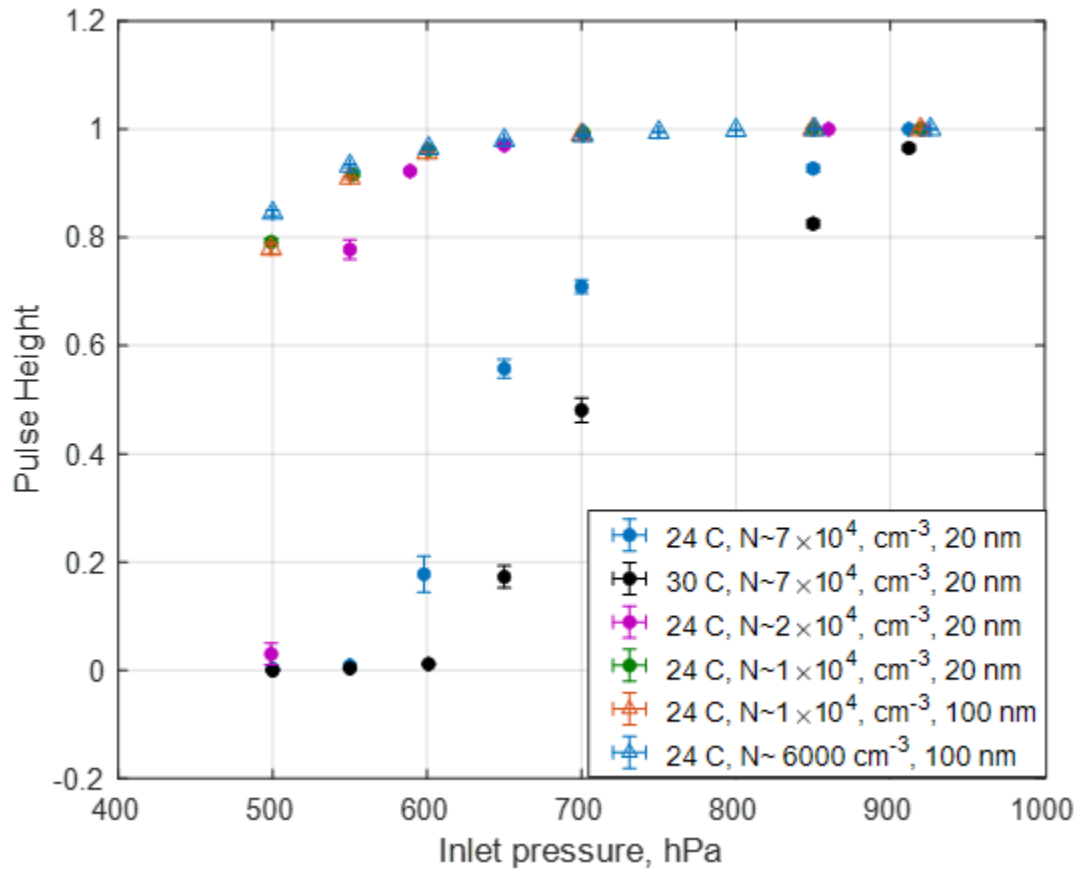

127  
128

(a)

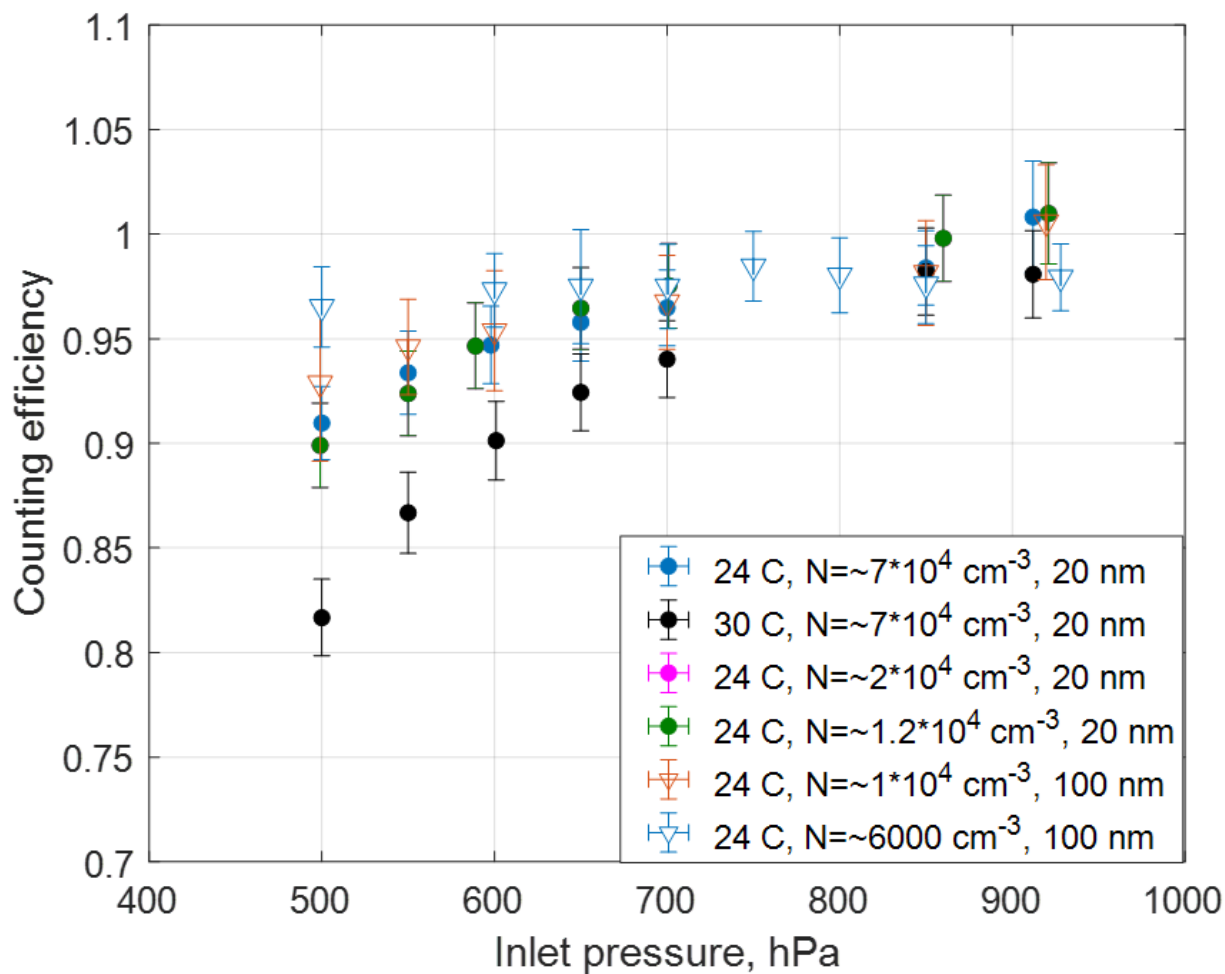

129

130

(b)

131 Fig. S6. The water depletion due to the aerosol number concentration, illustrated by (a) the pulse height generated in the  
 132 optical detector, (b) the counting efficiency as a function of the inlet pressure. Results are shown with the conditioner  
 133 temperatures set at 24 °C and 30 °C, with the initiator temperature at 59 °C and the moderater temperature at 10 °C.

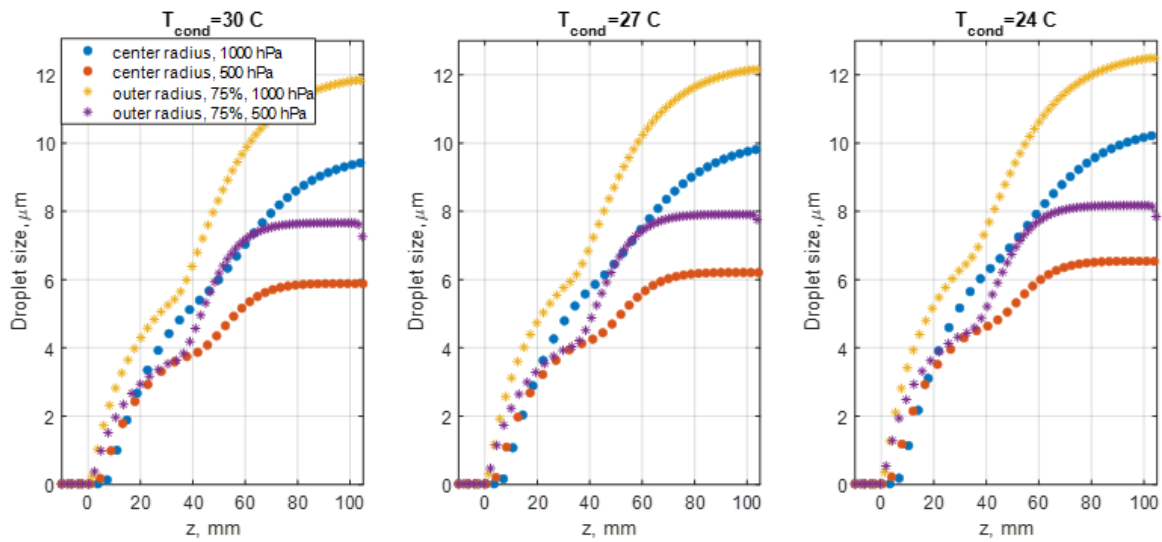

134

135 **Fig. S7. Predicted droplet size evolution along the growth tube of the CPC 3789 under the different conditioner temperatures**  
 136 **(30 °C, 27 °C, and 24 °C), with the initiator temperature at 59 °C and the moderater temperature at 10 °C. Starting particle**  
 137 **size is 20 nm.**

138

139

140

**Table S1.** Properties of tested aerosol particles.

| Properties                   | Ammonium sulfate                                                                                            | PSL                                                                     | Sucrose                                                                                                           | Humic acid                                                                                                          | Oleic acid                                                                                                | Water                                                                                 |
|------------------------------|-------------------------------------------------------------------------------------------------------------|-------------------------------------------------------------------------|-------------------------------------------------------------------------------------------------------------------|---------------------------------------------------------------------------------------------------------------------|-----------------------------------------------------------------------------------------------------------|---------------------------------------------------------------------------------------|
| Molecular weight (g/mol)     | 132.14                                                                                                      | N/A                                                                     | 342.3                                                                                                             | 227.17                                                                                                              | 282.47                                                                                                    | 18.02                                                                                 |
| Melting point                | 235 °C                                                                                                      | 100-110 °C*                                                             | 186 °C                                                                                                            | 300 °C                                                                                                              | 13.4 °C                                                                                                   | 0 °C                                                                                  |
| Density (g/cm <sup>3</sup> ) | 1.77                                                                                                        | 1.055 (20 °C)                                                           | 1.59                                                                                                              | 1.77                                                                                                                | 0.895                                                                                                     | 0.997 (20 °C)                                                                         |
| Water solubility             | 70.6 g/100 g water                                                                                          | insoluble                                                               | greater than or equal to 100 mg/mL at 66° F                                                                       | insoluble                                                                                                           | insoluble                                                                                                 | N/A                                                                                   |
| Reference                    | <a href="https://en.wikipedia.org/wiki/Ammonium_sulfate">https://en.wikipedia.org/wiki/Ammonium_sulfate</a> | <a href="https://www.thermofisher.com">https://www.thermofisher.com</a> | <a href="https://pubchem.ncbi.nlm.nih.gov/compound/Sucrose">https://pubchem.ncbi.nlm.nih.gov/compound/Sucrose</a> | <a href="https://pubchem.ncbi.nlm.nih.gov/compound/90472028">https://pubchem.ncbi.nlm.nih.gov/compound/90472028</a> | <a href="https://www.britannica.com/science/oleic-acid">https://www.britannica.com/science/oleic-acid</a> | <a href="https://en.wikipedia.org/wiki/Water">https://en.wikipedia.org/wiki/Water</a> |

141 \*Glass transition temperature

142

143

144

145

146

147 Bridgeman, O. C. and Aldrich, E. W.: Vapor Pressure Tables for Water, Journal of Heat Transfer, 86, 279-  
148 286, 1964.

149 Chen, D.-R. and Pui, D. Y.: Numerical and experimental studies of particle deposition in a tube with a  
150 conical contraction—laminar flow regime, J Aerosol Sci, 26, 563-574, 1995.

151 Fletcher, R. A., Mulholland, G., Winchester, M., King, R., and Klindinst, D.: Calibration of a condensation  
152 particle counter using a NIST traceable method, Aerosol Sci Tech, 43, 425-441, 2009.

153 Nenes, A. and Seinfeld, J. H.: Parameterization of cloud droplet formation in global climate models, J  
154 Geophys Res-Atmos, 108, 2003.

155 Seinfeld, J. H. and Pandis, S. N.: Atmospheric chemistry and physics: from air pollution to climate change,  
156 John Wiley & Sons, 2016.

157 Takegawa, N. and Sakurai, H.: Laboratory evaluation of a TSI condensation particle counter (Model 3771)  
158 under airborne measurement conditions, Aerosol Sci Tech, 45, 272-283, 2011.

159
